# Supplementary material for: Simultaneous induction of jasmonic acid and disease-responsive genes signifies tolerance of American elm to Dutch elm disease
Source: PubMed Central journal article supplement (PMC4763294; doi:10.1038/srep21934), 2016-02-23
Supplement: srep21934-s1.pdf [file srep21934-s1.pdf]

1           **Simultaneous induction of jasmonic acid and disease-responsive genes**  
2           **signifies tolerance of American elm to Dutch elm disease**

3           Sherif S.M<sup>1,2</sup>., Shukla M.R.<sup>1</sup>, Murch S.J<sup>3</sup>., Bernier L.<sup>4</sup>, Saxena P.K<sup>1</sup>.

4  
5           <sup>1</sup>Gosling Research Institute for Plant Preservation, Department of Plant Agriculture, University  
6 of Guelph, Guelph, ON, Canada

7           <sup>2</sup>Department of Horticulture, Faculty of Agriculture, Damanhour University, Al-Gomhuria St.,  
8 PO Box 22516, Damanhour, Al-Behira, Egypt

9           <sup>3</sup>Chemistry Department, University of British Columbia, Kelowna, BC, Canada

10          <sup>4</sup>Centre d'étude de la forêt (CEF) and Institut de biologie intégrative et des systèmes (IBIS),  
11 Université Laval, Québec City, QC, Canada

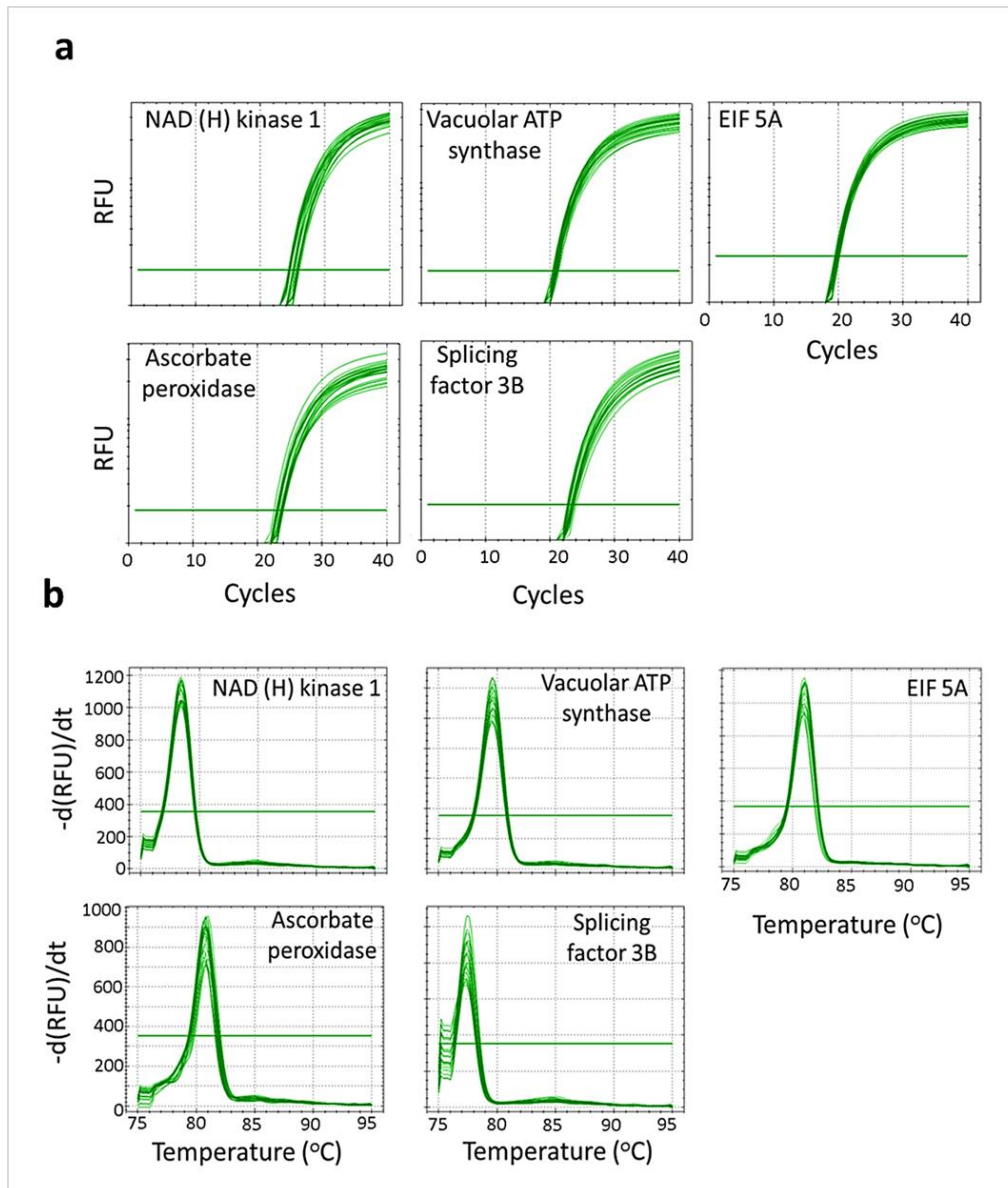

26

27 **Supplementary Fig 1. The transcriptional stability and amplification characteristics of five**  
 28 **internal reference genes investigated in elm saplings. (a)** The amplification rate of five  
 29 reference genes, encoding NAD (H) kinase 1, vacuolar ATP synthase, EIF 5a, ascorbate  
 30 peroxidase and splicing factor 3B, in eight cDNAs (three technical replicates each) prepared  
 31 from infected and non-infected ‘Valley Forge’ and susceptible elm saplings. The X-axis shows  
 32 the number of PCR cycles while the Y-axis shows the relative fluorescence units (RFU). **(b)**  
 33 Melt curve plots representing PCR products from the amplification shown in the upper panel.

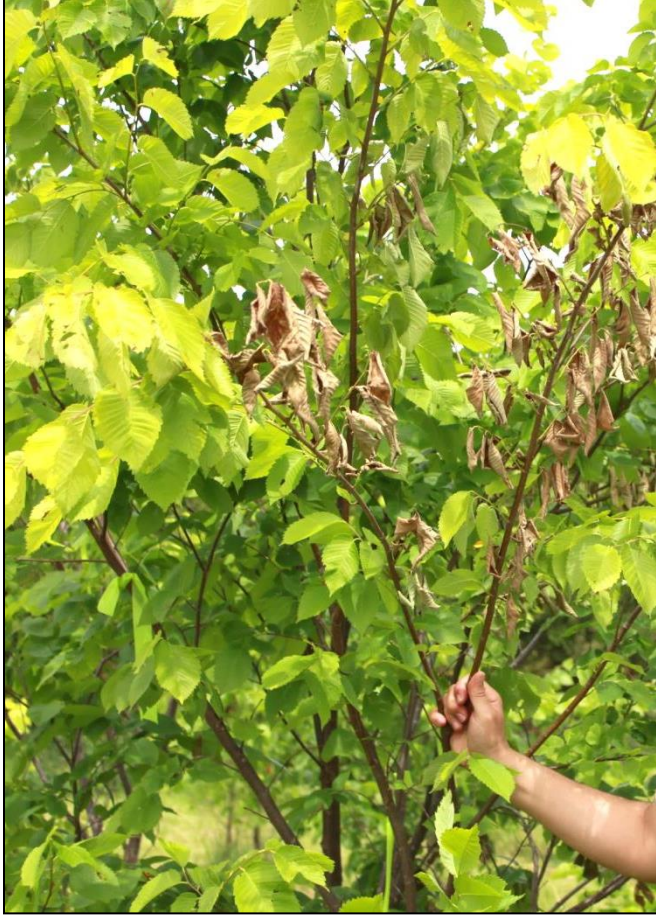

34

35 **Supplementary Fig. 2: The aggressiveness of *Ophiostoma novo-ulmi* (MH75-4O) was**  
36 **examined in mature elm trees.** Branches of a ten-year-old American elm tree grown were  
37 inoculated with 0.01 ml of spore suspension ( $10^7$  spore/ml) and observed for disease symptoms  
38 after two weeks post-inoculation.

39

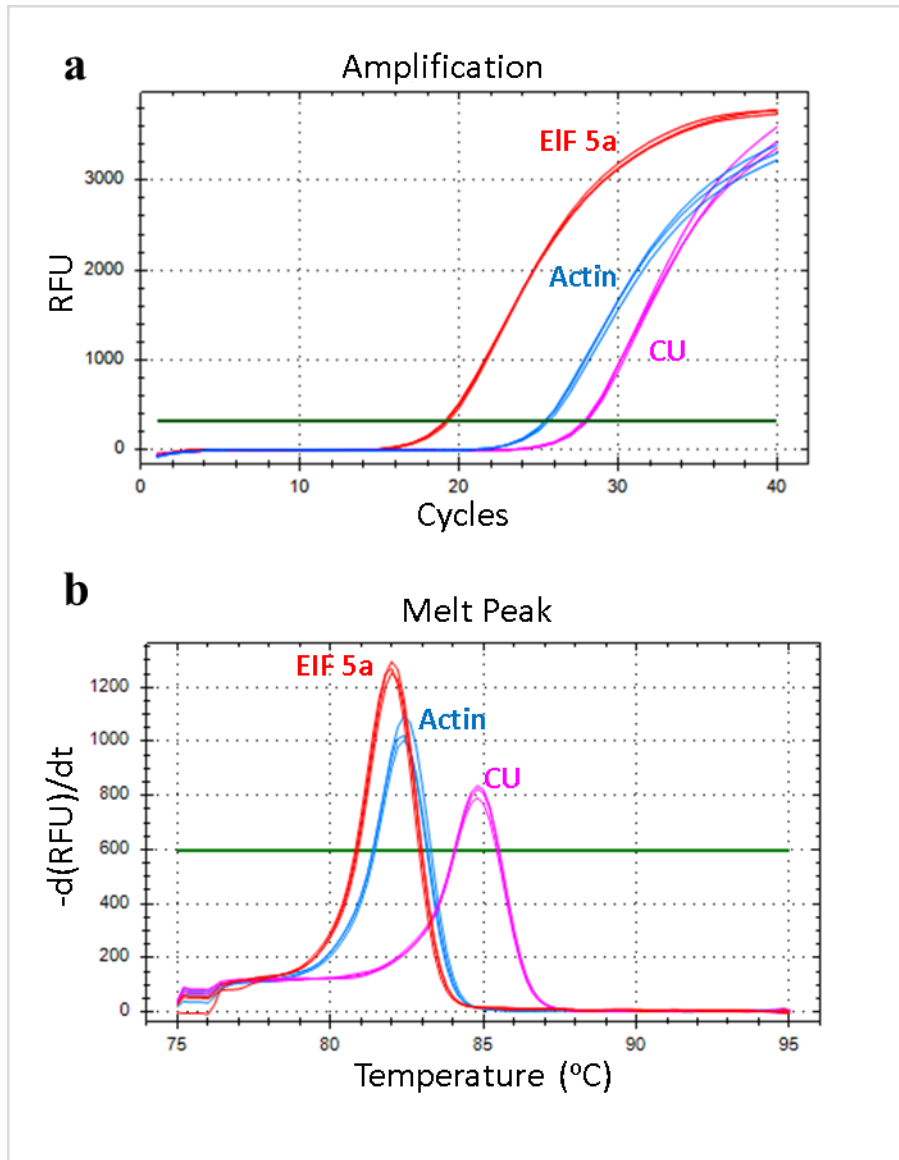

40

41 **Supplementary Fig. 3: The amplification characteristics of elm and fungal genes**  
 42 **investigated in infected elm wood tissues. (a)** The expression of elm (*EIF 5a*) and fungal genes  
 43 (*Actin*; *Cerato-ulmin*) was investigated in ‘Valley Forge’ and susceptible (s) elm saplings  
 44 inoculated with the fungus for 0, 24, 48, 96, 122 and 144 hpi. The X-axis shows the number of  
 45 PCR cycles while the Y-axis shows the relative fluorescence units (RFU). **(b)** Melt curve plots  
 46 representing PCR products from the amplification shown in the upper panel.

47

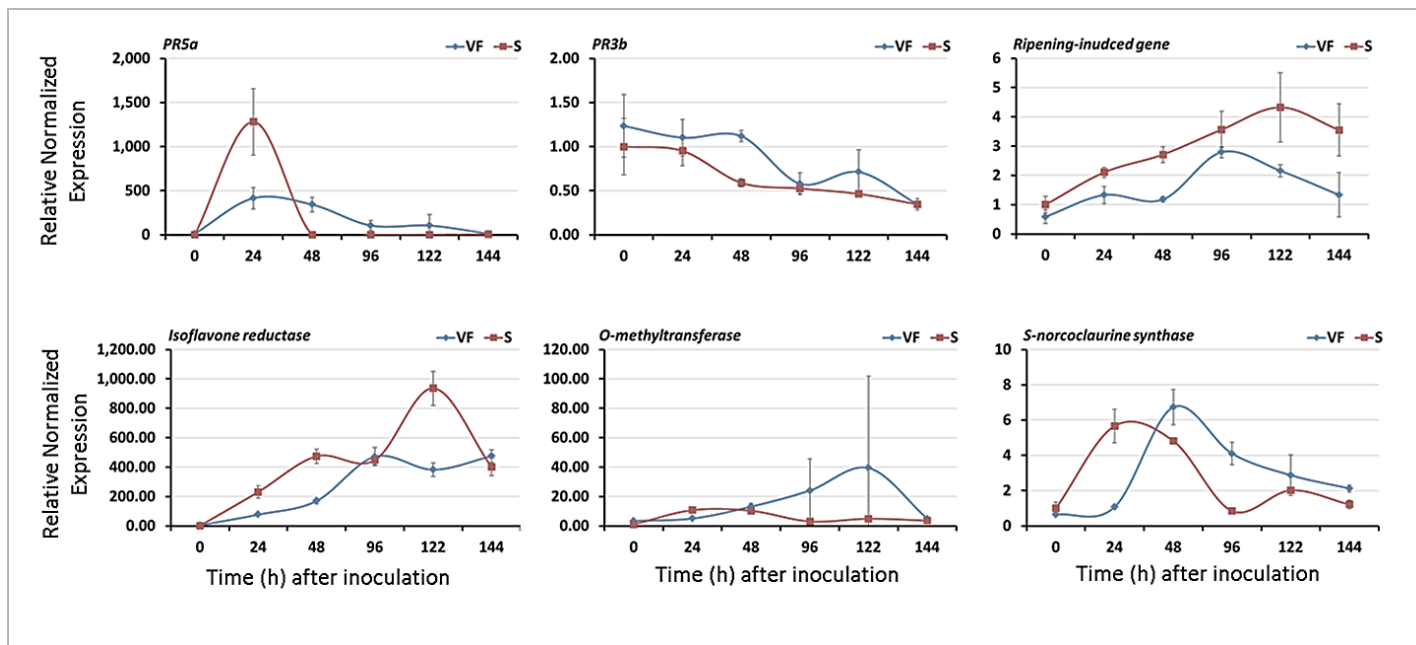

48

49 **Supplementary Fig. 4: Differential expression of disease-responsive genes in tolerant and**  
 50 **susceptible American elm saplings.** The expression of six genes encoding for different classes  
 51 of disease-inducible proteins was investigated in ‘Valley Forge’ (VF) and a susceptible (S)  
 52 American elm clone at 0-144 hpi with the *O. novo-ulmi* fungus. The expression of each gene was  
 53 normalized to that of three internal control genes (*EIF 5a*, *vacuolar ATP synthase* and *splicing*  
 54 *factor 3B*) and was calculated relative to the control sample (0 hpi) in the susceptible clone. The  
 55 results are the mean  $\pm$  SE of three biological replicates.

56

57

58

59

60

61

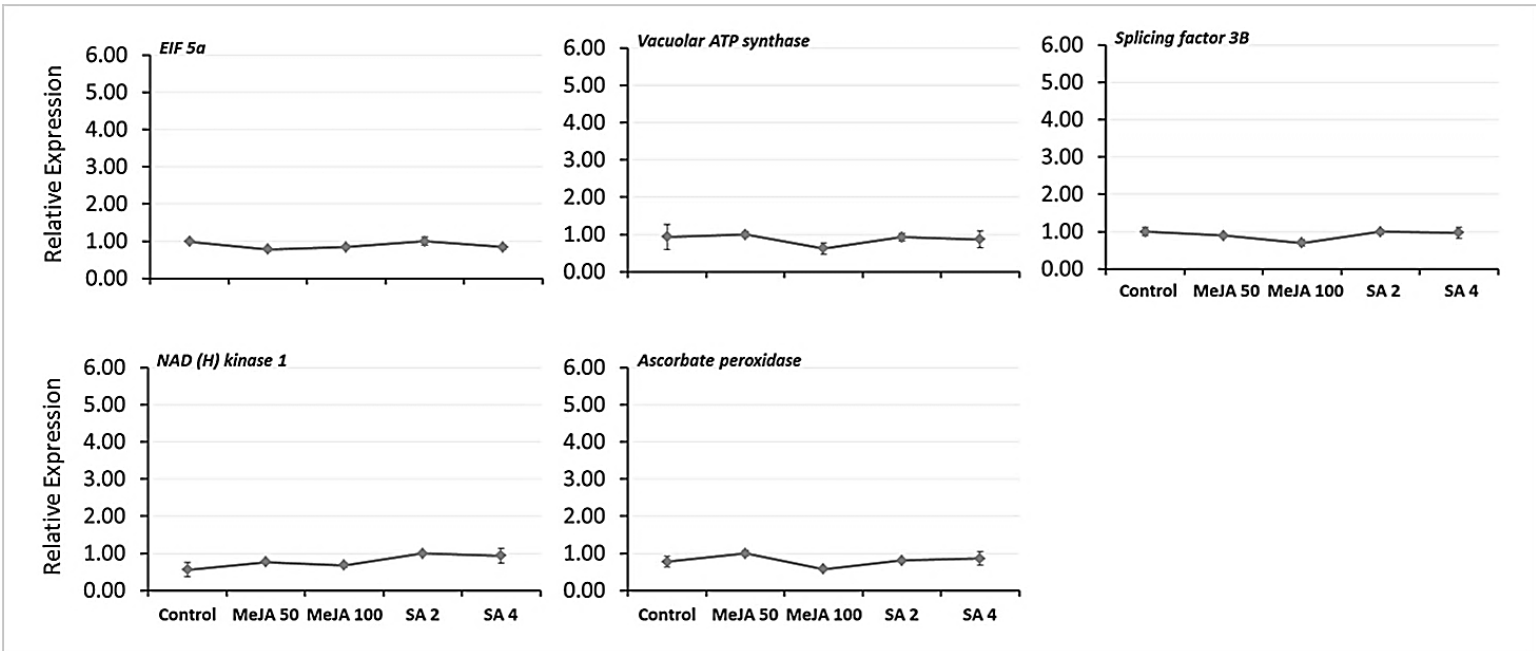

62

63 **Supplementary Fig 5. The transcriptional stability of five reference genes after treatments**  
 64 **with SA or MeJA.** The expression of five internal genes encoding NAD (H) kinase 1, vacuolar  
 65 ATP synthase, EIF 5a, ascorbate peroxidase and splicing factor 3B was investigated in the four-  
 66 year-old saplings of the susceptible elm clone at 24h of treatment with SA (2mM), SA (4 mM),  
 67 MeJA (50  $\mu$ M) or MeJA (100  $\mu$ M). The expression of each gene was calculated relative to the  
 68 control sample (0.01% ethanol).

69

70

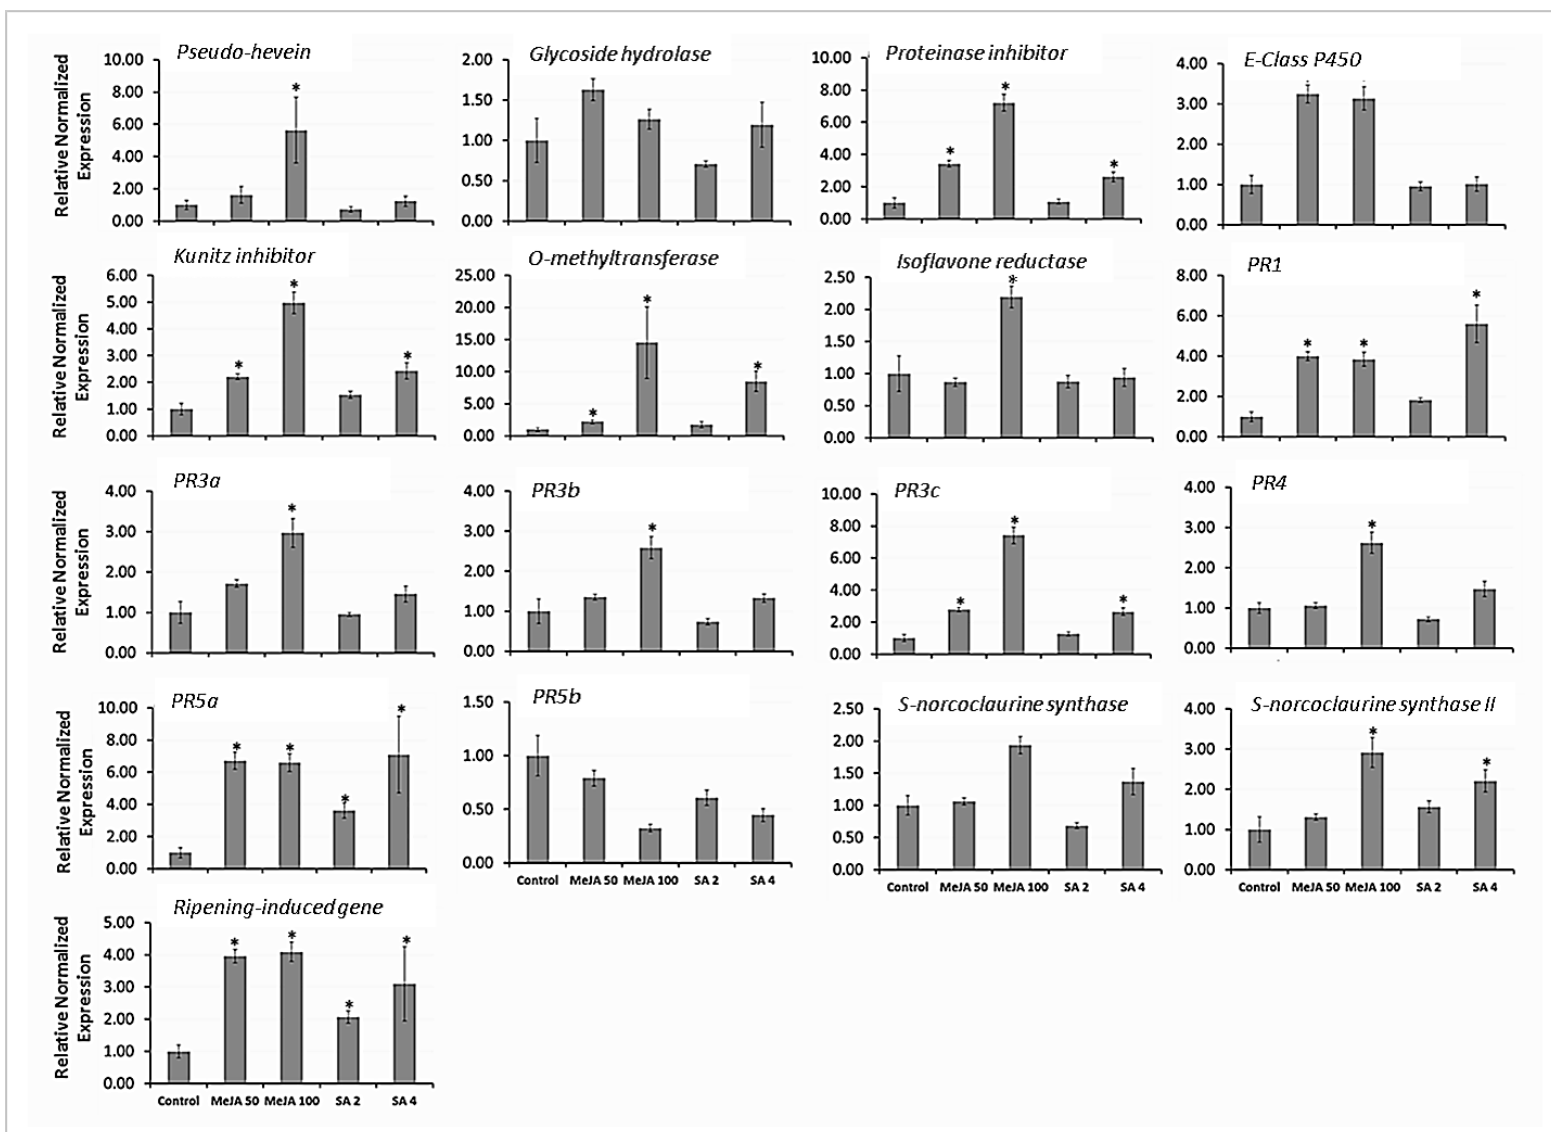

71

72 **Supplementary Fig. 6: Differential expression of disease-responsive genes after treatments**  
 73 **with SA or MeJA.** The expression of six genes encoding for different classes of disease-  
 74 inducible proteins were was investigated in the susceptible American elm clone at 24 hour of  
 75 treatment with SA (2mM), SA (4 mM), MeJA (50  $\mu$ M) or MeJA (100  $\mu$ M). The expression of  
 76 each gene was normalized to that of three reference genes (*EIF 5a*, *vacuolar ATP synthase* and  
 77 *splicing factor 3B*) and was calculated relative to the control sample (0.01% ethanol). The results  
 78 are the mean  $\pm$  SE of three biological replicates.

79



**a**

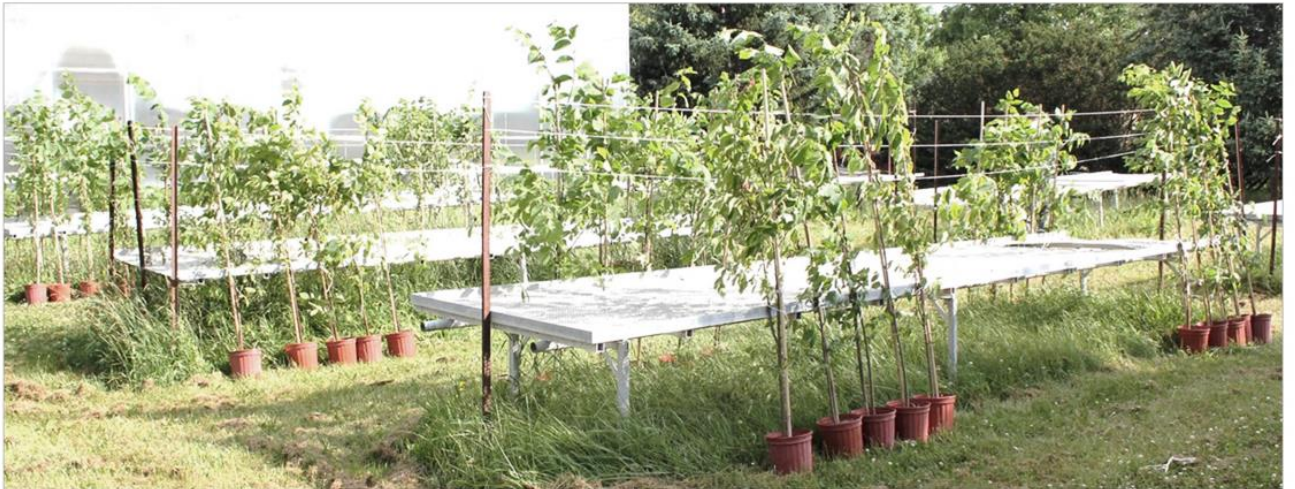

**b**

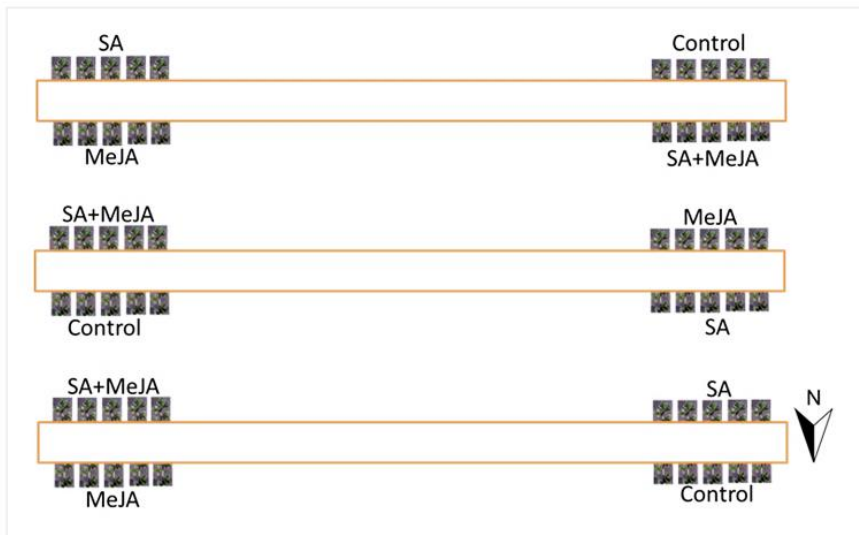

80

81 **Supplementary Fig. 7: Distribution of American elm seedlings in the field according to the**  
82 **randomized block design. (a)** Sixty American elm seedlings (4-year-old) distributed in an open  
83 field and used to examine the efficacy of applying defense elicitors to enhance the field tolerance  
84 of American elms to DED. **(b)** The distribution of treatments (Control, SA (2 mM), MeJA (50  
85  $\mu\text{M}$ ) and SA (2 mM) +MeJA (50  $\mu\text{M}$ ) and replicates (three replicates ( $n=5$ )) in three field blocks.  
86 The arrow points to the North.

87



88 **Supplementary Table 1: List of primer sequences used in this study.**

| <b>Gene Name</b>                             | <b>Accession Number</b> | <b>Primer Sequence</b> |
|----------------------------------------------|-------------------------|------------------------|
| <i>ELF-F</i>                                 | FC325680                | TCAAGGAGGGTTTTGCTGA    |
| <i>ELF-R</i>                                 |                         | CCAACGTCCTTGAGACCAC    |
| <i>Pseudo-hevein-F</i>                       | FC325206                | GACAAGCCCTACGCTTTCC    |
| <i>Pseudo-hevein-R</i>                       |                         | GGCACTTGCCACAAGACTC    |
| <i>Glycoside hydrolase-F</i>                 | FC325261                | TGCCAATATGCTGGAAACC    |
| <i>Glycoside hydrolase-R</i>                 |                         | GAAGCCCCAAGAACACCTG    |
| <i>E-class P450-F</i>                        | FC325322                | TTACTACGCCTGGGAATGC    |
| <i>E-class P450-R</i>                        |                         | AAGCGAGGCTTGATGAGAA    |
| <i>Isoflavone reductase-F</i>                | FC325532                | TCCGGACTTGTTGAAGCTC    |
| <i>Isoflavone reductase-R</i>                |                         | GGACATCCCACATTTGCTC    |
| <i>O-methyltransferase-F</i>                 | FC325422                | CCCTCTGATACAGGCATCG    |
| <i>O-methyltransferase-R</i>                 |                         | CACATATCCTTGCCGGTTG    |
| <i>S-norcochlorogenic acid synthase-II-F</i> | FC325579                | GGCGTTGGCACTATTGTCT    |
| <i>S-norcochlorogenic acid synthase-II-R</i> |                         | TCATGGTTCGATCTTGGTGA   |
| <i>Ripening-induced gene-F</i>               | FC325592                | TGCTTCGCCAACTGTATCA    |
| <i>Ripening-induced gene-R</i>               |                         | AGCTTAGGGGCTGATTTGG    |
| <i>Kunitz inhibitor-F</i>                    | FC325621                | TCGCAGGGATCATTATCGT    |
| <i>Kunitz inhibitor-R</i>                    |                         | TCTCGGTGACCTTTGATCC    |
| <i>S-norcochlorogenic acid synthase-F</i>    | FC325445                | CCACCTCCATTGCTTTAC     |
| <i>S-norcochlorogenic acid synthase-R</i>    |                         | TCTGCCTCAAATTCGTTCC    |
| <i>Proteinase inhibitor-F</i>                | FC325589                | TGCAGTGGAGACAATCGAG    |
| <i>Proteinase inhibitor-R</i>                |                         | CCAAACCCTTGAGCAGTCA    |
| <i>PAL-F</i>                                 | DQ078279                | GCTCTTAACAACGGCGAAA    |
| <i>PAL-R</i>                                 |                         | GGGCAAAGGGTCTTCAAT     |
| <i>PR5b-F</i>                                | FC325266                | CTGTAAGCTTCCGGGCATT    |
| <i>PR5b-R</i>                                |                         | TGCACTGGTGC GTTTAACA   |
| <i>PR5a-F</i>                                | FC325601                | CCGCAATGACTGCCATTAT    |

|                                |          |                      |
|--------------------------------|----------|----------------------|
| <i>PR5a-R</i>                  |          | CCACCCAAAGACTCCAGGT  |
| <i>PR4-F</i>                   | FC325240 | CTGGGACCTGAACAGAGCA  |
| <i>PR4-R</i>                   |          | CAAAAGGCAGTCCATCCAA  |
| <i>PR3a-F</i>                  | FC325284 | CCCCGGCAAGAGTTTCTAT  |
| <i>PR3a-R</i>                  |          | CCCGTTTAGAAGCCTCAGC  |
| <i>PR1-F</i>                   | FC325238 | TCGTGATCAGGTGGGTGTT  |
| <i>PR1-R</i>                   |          | TACAGTCGCCTTTCCGTTG  |
| <i>PR3b-F</i>                  | FC325581 | TCCATGCAACCCTAGCAAA  |
| <i>PR3b-R</i>                  |          | CGAAGTTGAGGGCTTCTCC  |
| <i>PR3c-F</i>                  | FC325338 | TGAGGCTTCTAAACGGGAGA |
| <i>PR3c-R</i>                  |          | CGCCTCCCGTCTCATCTAT  |
| <i>Vacuolar ATP synthase-F</i> | FC325256 | GCTGCAGAGCAAGAAGCTC  |
| <i>Vacuolar ATP synthase-R</i> |          | CAGCCTCTTCTTTGGCTTG  |
| <i>Splicing factor 3B-F</i>    | FC325436 | TTCCCCCTGAAAGAGAGGA  |
| <i>Splicing factor 3B-R</i>    |          | CAACCAACCGGATTTTCAG  |
| <i>NAD (H) kinase 1-F</i>      | FC325344 | TCGTCACATGTGTCCAAGG  |
| <i>NAD (H) kinase 1-R</i>      |          | AACCATTGATCCTCCAGCA  |
| <i>Ascorbate peroxidase-F</i>  | FC325348 | CACCACATCTTCGGGACAT  |
| <i>Ascorbate peroxidase-R</i>  |          | ATGTGCCCTTCCCAGTGTA  |
| <i>On-Actin-F</i>              | AF378562 | ATCAACCCCAAGTCCAACC  |
| <i>On-Actin-R</i>              |          | GGCCTGGATGTTGACGTAG  |
| <i>On-Cerato ulmin-F</i>       | KF725663 | AGCAACAGCGACTCCTACG  |
| <i>On-Cerato ulmin-R</i>       |          | AAGATTGGCCACACCAAGA  |

89

90

91

92

93

94

95 **Supplementary Table 2: Mass Spectrometer Parameters**

| <b>Compound</b> | <b>Formula</b>                                 | <b>Parent Ion (m/z)</b> | <b>Daughter Ion (m/z)</b> | <b>Cone (V)</b> | <b>Collision Cell (eV)</b> |
|-----------------|------------------------------------------------|-------------------------|---------------------------|-----------------|----------------------------|
| Jasmonic Acid   | C <sub>12</sub> H <sub>18</sub> O <sub>3</sub> | 211.13                  | 133                       | 22              | 14                         |
| Jasmonic Acid   | C <sub>12</sub> H <sub>18</sub> O <sub>3</sub> | 211.13                  | 151                       | 22              | 10                         |
| Ferulic Acid    | C <sub>10</sub> H <sub>10</sub> O <sub>4</sub> | 195.18                  | 167                       | 26              | 10                         |
| Ferulic Acid    | C <sub>10</sub> H <sub>10</sub> O <sub>4</sub> | 195.18                  | 95                        | 26              | 18                         |
| Salicylic Acid  | C <sub>7</sub> H <sub>6</sub> O <sub>3</sub>   | 139.12                  | 121                       | 6               | 12                         |
| Salicylic Acid  | C <sub>7</sub> H <sub>6</sub> O <sub>3</sub>   | 139.12                  | 95                        | 6               | 10                         |

96

97

98
